# Supplementary material for: Data assimilation for continuous global assessment of severe conditions over terrestrial surfaces
Source: Copernicus journal article supplement (doi:10.5194/hess-2019-534), 2019-10-25
Supplement: Supplementary file 1 [file hess-2019-534-supplement.pdf]

## Data assimilation for continuous global assessment of severe conditions over terrestrial surfaces: Supplementary materials

Clément Albergel<sup>1</sup>, Yongjun Zheng<sup>1</sup>, Bertrand Bonan<sup>1</sup>, Emanuel Dutra<sup>2</sup>, Nemesio Rodríguez-Fernández<sup>3</sup>, Simon Munier<sup>1</sup>, Clara Draper<sup>4</sup>, Patricia de Rosnay<sup>5</sup>, Joaquin Muñoz-Sabater<sup>5</sup>, Gianpaolo Balsamo<sup>5</sup>, David Fairbairn<sup>5</sup>, Catherine Meurey<sup>1</sup>, Jean-Christophe Calvet<sup>1</sup>

<sup>1</sup> CNRM, Université de Toulouse, Météo-France, CNRS, Toulouse, France

<sup>2</sup> Instituto Dom Luiz, IDL, Faculty of Sciences, University of Lisbon, Portugal

<sup>3</sup> CESBIO, Université de Toulouse, CNRS, CNES, IRD, Toulouse, France

<sup>4</sup> CIRES/NOAA Earth System Research Laboratory, Boulder, CO 80309, USA

<sup>5</sup> European Centre for Medium-Range Weather Forecasts, Shinfield Road, Reading RG2 9AX, UK

\* Correspondence: [clement.albergel@meteo.fr](mailto:clement.albergel@meteo.fr)

This supplementary materials reports on illustrations from the evaluation of LDAS-Monde analysis (assimilation of satellite derived Surface Soil Moisture, SSM, and Leaf Area Index, LAI) and open-loop (model-only, no assimilation) against in situ measurements of (i) evapotranspiration from the FLUXNET 2015 synthesis data set (<http://fluxnet.fluxdata.org/>, last access June 2019), (ii) soil moisture from the International Soil Moisture Network (ISMN, <https://ismn.geo.tuwien.ac.at/en/>, last access June 2019) as well as river discharge from several networks across the world.

Table SI. In situ river discharge datasets used in this study.

| Datasets (N stations used)                       | Website                                                                                                                                                                                                                                                                                                                           |
|--------------------------------------------------|-----------------------------------------------------------------------------------------------------------------------------------------------------------------------------------------------------------------------------------------------------------------------------------------------------------------------------------|
| AFD (14): Anuario de aforos digital, Spain       | <a href="http://ceh-flumen64.cedex.es/anuarioaforos/default.asp">http://ceh-flumen64.cedex.es/anuarioaforos/default.asp</a>                                                                                                                                                                                                       |
| ANA (23): HidroWeb, Brazil                       | <a href="http://hidroweb.ana.gov.br/default.as">http://hidroweb.ana.gov.br/default.as</a>                                                                                                                                                                                                                                         |
| FRENCH (37): Banque HYDRO, France                | <a href="http://www.hydro.eaufrance.fr/">http://www.hydro.eaufrance.fr/</a>                                                                                                                                                                                                                                                       |
| GRDC (360): Global Runoff Data Centre, Globe     | <a href="https://www.bafg.de/GRDC/EN/02_srvcs/21_tmsrs/riverdischarge_node.html">https://www.bafg.de/GRDC/EN/02_srvcs/21_tmsrs/riverdischarge_node.html</a>                                                                                                                                                                       |
| HYBAM (11): ORE-HYBAM, Amazon Basin              | <a href="http://www.ore-hybam.org/index.php/en">http://www.ore-hybam.org/index.php/en</a>                                                                                                                                                                                                                                         |
| HYDAT (102): National Water Data Archive, Canada | <a href="https://www.canada.ca/en/environment-climate-change/services/water-overview/quantity/monitoring/survey/data-products-services/national-archive-hydat.html">https://www.canada.ca/en/environment-climate-change/services/water-overview/quantity/monitoring/survey/data-products-services/national-archive-hydat.html</a> |
| USGS (435): United States Geological Survey, USA | <a href="https://www.usgs.gov/mission-areas/water-resources">https://www.usgs.gov/mission-areas/water-resources</a>                                                                                                                                                                                                               |

Table S2: Fluxnet-2015 sites used in this study

| FLUXNET-ID | (latitude, longitude) | data-years used | data DOI             |
|------------|-----------------------|-----------------|----------------------|
| AR-Vir     | (-33.4648, -66.4598)  | 2010-2012       | 10.18140/FLX/1440192 |
| AT-Neu     | (47.1167, 11.3175)    | 2010-2012       | 10.18140/FLX/1440121 |
| AU-ASM     | (-22.2830, 133.2490)  | 2010-2013       | 10.18140/FLX/1440194 |
| AU-Cpr     | (-34.0021, 140.5891)  | 2010-2014       | 10.18140/FLX/1440195 |
| AU-DaP     | (-14.0633, 131.3181)  | 2010-2013       | 10.18140/FLX/1440123 |
| AU-DaS     | (-14.1593, 131.3881)  | 2010-2014       | 10.18140/FLX/1440122 |
| AU-Dry     | (-15.2588, 132.3706)  | 2010-2014       | 10.18140/FLX/1440197 |
| AU-Emr     | (-23.8587, 148.4746)  | 2011-2013       | 10.18140/FLX/1440198 |
| AU-Gin     | (-31.3764, 115.7138)  | 2011-2014       | 10.18140/FLX/1440199 |
| AU-How     | (-12.4943, 131.1523)  | 2010-2014       | 10.18140/FLX/1440125 |
| AU-Rig     | (-36.6499, 145.5759)  | 2011-2014       | 10.18140/FLX/1440202 |
| AU-Stp     | (-17.1507, 133.3502)  | 2010-2014       | 10.18140/FLX/1440204 |
| AU-TTE     | (-22.2870, 133.6400)  | 2012-2013       | 10.18140/FLX/1440205 |
| AU-Tum     | (-35.6566, 148.1517)  | 2010-2014       | 10.18140/FLX/1440126 |
| AU-Whr     | (-36.6732, 145.0294)  | 2011-2014       | 10.18140/FLX/1440206 |
| AU-Wom     | (-37.4222, 144.0944)  | 2010-2012       | 10.18140/FLX/1440207 |
| BE-Bra     | (51.3076, 4.5198)     | 2010-2014       | 10.18140/FLX/1440128 |
| BE-Lon     | (50.5516, 4.7461)     | 2010-2014       | 10.18140/FLX/1440129 |
| BE-Vie     | (50.3050, 5.9981)     | 2010-2014       | 10.18140/FLX/1440130 |
| CH-Cha     | (47.2102, 8.4104)     | 2010-2014       | 10.18140/FLX/1440131 |
| CH-Dav     | (46.8153, 9.8559)     | 2010-2014       | 10.18140/FLX/1440132 |
| CH-Fru     | (47.1158, 8.5378)     | 2010-2014       | 10.18140/FLX/1440133 |
| CH-Lae     | (47.4781, 8.3650)     | 2010-2014       | 10.18140/FLX/1440134 |
| CH-Oe2     | (47.2863, 7.7343)     | 2010-2014       | 10.18140/FLX/1440136 |
| CN-Sw2     | (41.7902, 111.8971)   | 2010-2012       | 10.18140/FLX/1440212 |
| CZ-wet     | (49.0247, 14.7704)    | 2010-2014       | 10.18140/FLX/1440145 |
| DE-Akm     | (53.8662, 13.6834)    | 2010-2014       | 10.18140/FLX/1440213 |
| DE-Geb     | (51.1001, 10.9143)    | 2010-2014       | 10.18140/FLX/1440146 |
| DE-Gri     | (50.9500, 13.5126)    | 2010-2014       | 10.18140/FLX/1440147 |
| DE-Kli     | (50.8931, 13.5224)    | 2010-2014       | 10.18140/FLX/1440149 |
| DE-Lkb     | (49.0996, 13.3047)    | 2010-2013       | 10.18140/FLX/1440214 |
| DE-Obe     | (50.7867, 13.7212)    | 2010-2014       | 10.18140/FLX/1440151 |
| DE-RuR     | (50.6219, 6.3041)     | 2011-2014       | 10.18140/FLX/1440215 |
| DE-RuS     | (50.8659, 6.4472)     | 2011-2014       | 10.18140/FLX/1440216 |
| DE-SfN     | (47.8064, 11.3275)    | 2012-2014       | 10.18140/FLX/1440219 |
| DE-Spw     | (51.8922, 14.0337)    | 2010-2014       | 10.18140/FLX/1440220 |
| DE-Tha     | (50.9624, 13.5652)    | 2010-2014       | 10.18140/FLX/1440152 |
| DK-NuF     | (64.1308, -51.3861)   | 2010-2014       | 10.18140/FLX/1440222 |
| DK-Sor     | (55.4859, 11.6446)    | 2010-2014       | 10.18140/FLX/1440155 |
| DK-ZaH     | (74.4733, -20.5503)   | 2010-2011       | 10.18140/FLX/1440224 |
| FI-Hyy     | (61.8474, 24.2948)    | 2010-2014       | 10.18140/FLX/1440158 |
| FI-Sod     | (67.3624, 26.6386)    | 2010-2014       | 10.18140/FLX/1440160 |
| IT-BCi     | (40.5237, 14.9574)    | 2010-2014       | 10.18140/FLX/1440166 |
| IT-CA1     | (42.3804, 12.0266)    | 2011-2014       | 10.18140/FLX/1440230 |
| IT-CA2     | (42.3772, 12.0260)    | 2011-2014       | 10.18140/FLX/1440231 |
| IT-CA3     | (42.3800, 12.0222)    | 2011-2014       | 10.18140/FLX/1440232 |
| IT-Col     | (41.8494, 13.5881)    | 2010-2014       | 10.18140/FLX/1440167 |
| IT-Lav     | (45.9562, 11.2813)    | 2010-2014       | 10.18140/FLX/1440169 |
| IT-MBo     | (46.0147, 11.0458)    | 2010-2013       | 10.18140/FLX/1440170 |
| IT-Ren     | (46.5869, 11.4337)    | 2010-2013       | 10.18140/FLX/1440173 |
| IT-Ro2     | (42.3903, 11.9209)    | 2010-2012       | 10.18140/FLX/1440175 |
| IT-SRo     | (43.7279, 10.2844)    | 2013-2014       | 10.18140/FLX/1440176 |
| IT-Tor     | (45.8444, 7.5781)     | 2010-2014       | 10.18140/FLX/1440237 |
| NL-Loo     | (52.1666, 5.7436)     | 2010-2013       | 10.18140/FLX/1440178 |
| RU-Cok     | (70.8291, 147.4943)   | 2010-2014       | 10.18140/FLX/1440182 |
| RU-Fyo     | (56.4615, 32.9221)    | 2010-2014       | 10.18140/FLX/1440183 |
| US-AR1     | (36.4267, -99.4200)   | 2010-2012       | 10.18140/FLX/1440103 |
| US-AR2     | (36.6358, -99.5975)   | 2010-2012       | 10.18140/FLX/1440104 |

|        |                      |           |                      |
|--------|----------------------|-----------|----------------------|
| US-ARM | (36.6058, -97.4888)  | 2010-2012 | 10.18140/FLX/1440066 |
| US-GLE | (41.3665, -106.2399) | 2010-2014 | 10.18140/FLX/1440069 |
| US-Ha1 | (42.5378, -72.1715)  | 2010-2012 | 10.18140/FLX/1440071 |
| US-Los | (46.0827, -89.9792)  | 2010-2014 | 10.18140/FLX/1440076 |
| US-Me2 | (44.4523, -121.557)  | 2010-2014 | 10.18140/FLX/1440079 |
| US-Me6 | (44.3233, -121.6078) | 2010-2014 | 10.18140/FLX/1440099 |
| US-MMS | (39.3232, -86.4131)  | 2010-2014 | 10.18140/FLX/1440083 |
| US-Myb | (38.0499, -121.7650) | 2010-2014 | 10.18140/FLX/1440105 |
| US-Ne1 | (41.1651, -96.4766)  | 2010-2013 | 10.18140/FLX/1440084 |
| US-Ne2 | (41.1649, -96.4701)  | 2010-2013 | 10.18140/FLX/1440085 |
| US-Ne3 | (41.1797, -96.4397)  | 2010-2013 | 10.18140/FLX/1440086 |
| US-NR1 | (40.0329, -105.5464) | 2010-2014 | 10.18140/FLX/1440087 |
| US-PFa | (45.9459, -90.2723)  | 2010-2014 | 10.18140/FLX/1440089 |
| US-Prr | (65.1237, -147.4876) | 2010-2013 | 10.18140/FLX/1440113 |
| US-SRG | (31.7894, -110.8277) | 2010-2014 | 10.18140/FLX/1440114 |
| US-SRM | (31.8214, -110.8661) | 2010-2014 | 10.18140/FLX/1440090 |
| US-Syv | (46.2420, -89.3477)  | 2010-2014 | 10.18140/FLX/1440091 |
| US-Ton | (38.4316, -120.9660) | 2010-2014 | 10.18140/FLX/1440092 |
| US-Tw1 | (38.1074, -121.6469) | 2012-2014 | 10.18140/FLX/1440108 |
| US-Twt | (38.1087, -121.6531) | 2010-2014 | 10.18140/FLX/1440106 |
| US-UMB | (45.5598, -84.7138)  | 2010-2014 | 10.18140/FLX/1440093 |
| US-UMd | (45.5625, -84.6975)  | 2010-2014 | 10.18140/FLX/1440101 |
| US-Var | (38.4133, -120.9507) | 2010-2014 | 10.18140/FLX/1440094 |
| US-WCr | (45.8059, -90.0799)  | 2010-2014 | 10.18140/FLX/1440095 |
| US-Whs | (31.7438, -110.0522) | 2010-2014 | 10.18140/FLX/1440097 |
| US-Wkg | (31.7365, -109.9419) | 2010-2014 | 10.18140/FLX/1440096 |
| ZA-Kru | (-25.0197, 31.4969)  | 2010-2010 | 10.18140/FLX/1440188 |

Table S3: Evaluation of LDAS-ERA5 analysis and open-loop surface soil moisture against in situ measurements of surface soil moisture from the International Soil Moisture Network (ISMN, <https://ismn.geo.tuwien.ac.at/en/>, last access June 2019). Unbiased RMSD, correlation (R) and bias values are reported along with informations specific to each network used (acronyms, sensor depth, localisation, number of sensors used in the study as well as mean sampling).

|          | <b>ubRMSD</b><br>(m <sup>3</sup> m <sup>-3</sup> )                                                                                        | <b>R</b><br>(-) | <b>Bias</b><br>(Analysis or<br>Model - insitu)<br>(m <sup>3</sup> m <sup>-3</sup> ) | <b>ubRMSD</b><br>(m <sup>3</sup> m <sup>-3</sup> )                                                                                                | <b>R</b><br>(-) | <b>Bias</b><br>(Analysis or<br>Model - insitu)<br>(m <sup>3</sup> m <sup>-3</sup> ) |
|----------|-------------------------------------------------------------------------------------------------------------------------------------------|-----------------|-------------------------------------------------------------------------------------|---------------------------------------------------------------------------------------------------------------------------------------------------|-----------------|-------------------------------------------------------------------------------------|
|          | <b>AMMA-CATCH</b> (0.05-0.05 cm)<br>Benin, Niger, Mali, 9 sensors, Npt=1661<br>(Lebel et al., 2009)                                       |                 |                                                                                     | <b>FR-Aqui</b> (0.05-0.05cm)<br>France, 3 sensors, Npt=1200                                                                                       |                 |                                                                                     |
| Model    | 0.032                                                                                                                                     | 0.74            | 0.124                                                                               | 0.044                                                                                                                                             | 0.80            | 0.068                                                                               |
| Analysis | 0.034                                                                                                                                     | 0.72            | 0.123                                                                               | 0.044                                                                                                                                             | 0.80            | 0.071                                                                               |
|          | <b>OZNET</b> (0.00-0.05 cm)<br>Australia, 19 sensors, Npt=1891<br>(Smith et al., 2012)                                                    |                 |                                                                                     | <b>HOBE</b> (0.00-0.05cm)<br>Denmark, 137 sensors, Npt=795<br>(Bircher et al., 2011)                                                              |                 |                                                                                     |
| Model    | 0.067                                                                                                                                     | 0.74            | 0.079                                                                               | 0.055                                                                                                                                             | 0.58            | 0.024                                                                               |
| Analysis | 0.067                                                                                                                                     | 0.75            | 0.086                                                                               | 0.055                                                                                                                                             | 0.58            | 0.024                                                                               |
|          | <b>OZNET</b> (0.00-0.08 cm)<br>Australia, 19 sensors, Npt=949<br>(Smith et al., 2012)                                                     |                 |                                                                                     | <b>HYDROL-NET-PERUGIA</b> (0.05-0.05 cm)<br>Italy, 1 sensors, Npt=998<br>(Morbideilli et al., 2014)                                               |                 |                                                                                     |
| Model    | 0.041                                                                                                                                     | 0.71            | 0.105                                                                               | 0.046                                                                                                                                             | 0.74            | 0.040                                                                               |
| Analysis | 0.040                                                                                                                                     | 0.73            | 0.111                                                                               | 0.046                                                                                                                                             | 0.74            | 0.040                                                                               |
|          | <b>BIEBRZA-S-1</b> (0.05-0.05 cm)<br>Poland, 38 sensors, Npt=617<br>( <a href="http://www.igik.edu.pl/en">http://www.igik.edu.pl/en</a> ) |                 |                                                                                     | <b>MOL-RAO</b> (0.08-0.08 cm)<br>Germany, 1 sensors, Npt=953<br>(Beyrich et al., 2007)                                                            |                 |                                                                                     |
| Model    | 0.096                                                                                                                                     | 0.58            | -0.032                                                                              | 0.040                                                                                                                                             | 0.79            | 0.045                                                                               |
| Analysis | 0.097                                                                                                                                     | 0.56            | -0.042                                                                              | 0.040                                                                                                                                             | 0.80            | 0.047                                                                               |
|          | <b>DAHRA</b> (0.05-0.05 cm)<br>Sénégal, 2 sensors, Npt=1821<br>(Tagesson et al., 2015)                                                    |                 |                                                                                     | <b>PBO-H20</b> (0.00 0.05 cm)<br>USA, 146 sensors, Npt = 1432<br>(Larson et al., 2008)                                                            |                 |                                                                                     |
| Model    | 0.026                                                                                                                                     | 0.72            | 0.063                                                                               | 0.051                                                                                                                                             | 0.61            | 0.085                                                                               |
| Analysis | 0.025                                                                                                                                     | 0.72            | 0.062                                                                               | 0.051                                                                                                                                             | 0.62            | 0.087                                                                               |
|          | <b>DAHRA</b> (0.05-0.05 cm)<br>Sénégal, 1 sensors, Npt=1821<br>(Tagesson et al., 2015)                                                    |                 |                                                                                     | <b>REMEDIHUS</b> (0.00-0.05 cm)<br>Spain, 20 sensors, Npt=2309<br>( <a href="http://campus.usal.es/~hidrus/">http://campus.usal.es/~hidrus/</a> ) |                 |                                                                                     |
| Model    | 0.024                                                                                                                                     | 0.69            | 0.076                                                                               | 0.046                                                                                                                                             | 0.73            | 0.134                                                                               |
| Analysis | 0.024                                                                                                                                     | 0.69            | 0.075                                                                               | 0.046                                                                                                                                             | 0.73            | 0.133                                                                               |
|          | <b>FMI</b> (0.05-0.05 cm)<br>Finland, 46 sensors, Npt=1108<br>( <a href="http://fmiarc.fmi.fi/">http://fmiarc.fmi.fi/</a> )               |                 |                                                                                     | <b>RSMN</b> (0.00-0.05 cm)<br>Romania, 19 sensors, Npt=1032<br>( <a href="http://assimo.meteoromania.ro">http://assimo.meteoromania.ro</a> )      |                 |                                                                                     |
| Model    | 0.035                                                                                                                                     | 0.68            | 0.254                                                                               | 0.049                                                                                                                                             | 0.56            | 0.141                                                                               |
| Analysis | 0.036                                                                                                                                     | 0.67            | 0.248                                                                               | 0.049                                                                                                                                             | 0.56            | 0.143                                                                               |
|          | <b>ARM</b> (0.05-0.05 cm)<br>USA, 10 sensors, Npt=932<br>( <a href="http://www.arm.gov/">http://www.arm.gov/</a> )                        |                 |                                                                                     | <b>SCAN</b> (0.05-0.05 cm)<br>USA, 160 sensors, Npt=1841<br>( <a href="http://www.wcc.nrcs.usda.gov/">http://www.wcc.nrcs.usda.gov/</a> )         |                 |                                                                                     |
| Model    | 0.092                                                                                                                                     | 0.30            | -0.023                                                                              | 0.059                                                                                                                                             | 0.63            | 0.078                                                                               |
| Analysis | 0.091                                                                                                                                     | 0.29            | -0.018                                                                              | 0.058                                                                                                                                             | 0.64            | 0.080                                                                               |

|          | <b>ubRMSD<br/>(m<sup>3</sup>m<sup>-3</sup>)</b>                                                                                             | <b>R<br/>(-)</b> | <b>Bias<br/>(Analyse or<br/>Model - insitu)<br/>(m<sup>3</sup>m<sup>-3</sup>)</b> | <b>ubRMSD<br/>(m<sup>3</sup>m<sup>-3</sup>)</b>                                           | <b>R<br/>(-)</b> | <b>Bias<br/>(Analyse or<br/>Model - insitu)<br/>(m<sup>3</sup>m<sup>-3</sup>)</b> |
|----------|---------------------------------------------------------------------------------------------------------------------------------------------|------------------|-----------------------------------------------------------------------------------|-------------------------------------------------------------------------------------------|------------------|-----------------------------------------------------------------------------------|
|          | <b>SMOSMANIA</b> (0.05-0.05 cm)<br>France, 23 sensors, Npt=1985<br>(Albergel et al., 2008)                                                  |                  |                                                                                   | <b>UMBRIA</b> (0.05-0.05 cm)<br>Italy, 16 sensors, Npt=1288<br>(Brocca et al., 2011)      |                  |                                                                                   |
| Model    | 0.047                                                                                                                                       | 0.80             | 0.076                                                                             | 0.065                                                                                     | 0.73             | 0.057                                                                             |
| Analysis | 0.047                                                                                                                                       | 0.80             | 0.077                                                                             | 0.064                                                                                     | 0.73             | 0.057                                                                             |
|          | <b>SNOTEL</b> (0.05-0.05 cm)<br>USA, 269 sensors, Npt=1160<br>( <a href="http://www.wcc.nrcs.usda.gov/">http://www.wcc.nrcs.usda.gov/</a> ) |                  |                                                                                   | <b>TERENO</b> (0.05-0.05 cm)<br>Germany, 14 sensors, Npt=1449<br>(Zacharias et al., 2011) |                  |                                                                                   |
| Model    | 0.073                                                                                                                                       | 0.65             | 0.075                                                                             | 0.055                                                                                     | 0.76             | 0.025                                                                             |
| Analysis | 0.073                                                                                                                                       | 0.65             | 0.075                                                                             | 0.054                                                                                     | 0.76             | 0.024                                                                             |
|          | <b>SOILSCAPE</b> (0.04-0.04 cm)<br>USA, 7 sensors, Npt=785<br>(Moghaddam et al., 2016)                                                      |                  |                                                                                   | <b>USCRN</b> (0.05 0.05 cm)<br>USA, 114 sensors, Npt=2090<br>(Bell et al., 2013)          |                  |                                                                                   |
| Model    | 0.061                                                                                                                                       | 0.55             | 0.014                                                                             | 0.050                                                                                     | 0.73             | 0.083                                                                             |
| Analysis | 0.060                                                                                                                                       | 0.56             | 0.018                                                                             | 0.050                                                                                     | 0.73             | 0.085                                                                             |
|          | <b>SOILSCAPE</b> (0.05-0.05 cm)<br>USA, 49 sensors, Npt=999<br>(Moghaddam et al., 2016)                                                     |                  |                                                                                   |                                                                                           |                  |                                                                                   |
| Model    | 0.054                                                                                                                                       | 0.88             | 0.064                                                                             |                                                                                           |                  |                                                                                   |
| Analysis | 0.054                                                                                                                                       | 0.88             | 0.064                                                                             |                                                                                           |                  |                                                                                   |

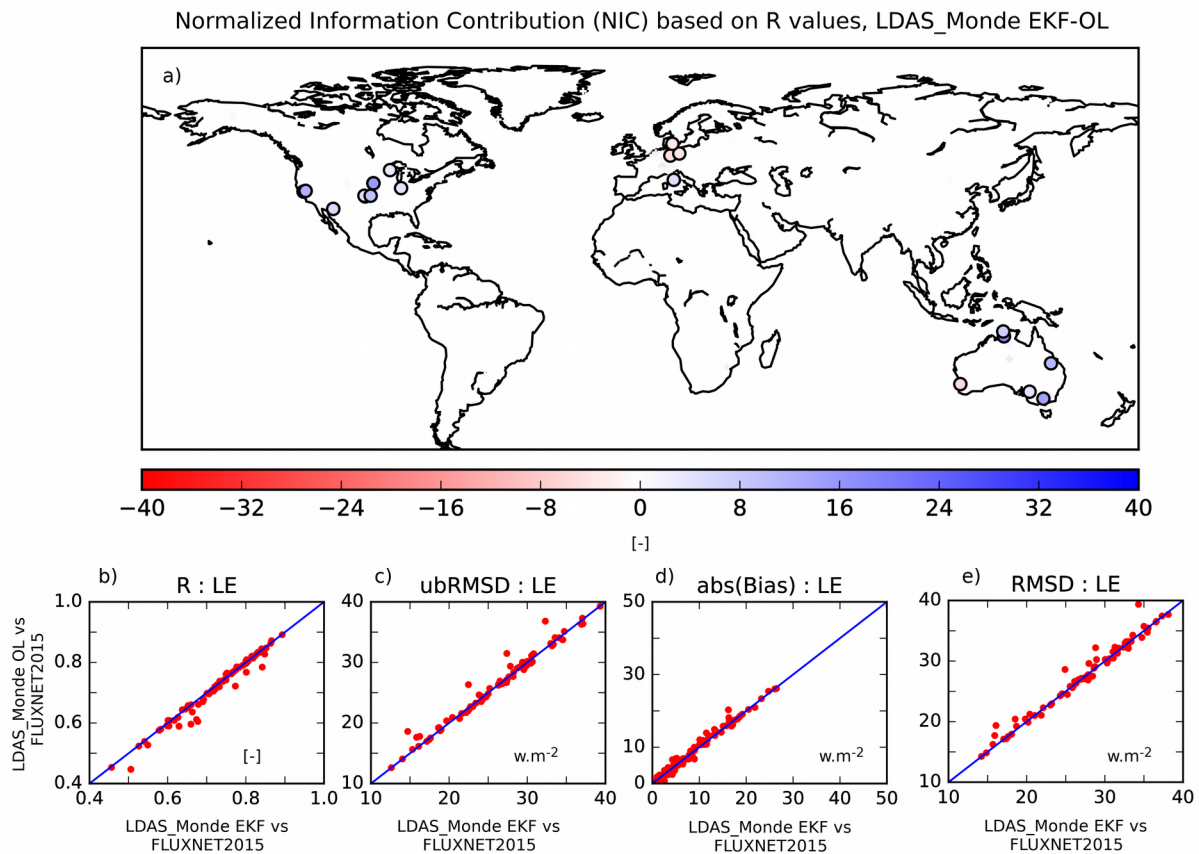

Figure S1: (a) Map of Normalized Information Contribution (NIC, Equation 1) applied on correlation values between evapotranspiration from LDAS\_ERA5 analysis (open-loop) and observations from the FLUXNET 2015 synthesis data set. NIC scores are classified into 2 categories (i) negative impact from the analysis with respect to the model with values smaller than -3 % (red circles, 5 stations), (ii) positive impact from the analysis with respect to the model with values greater than +3 % (blue circles, 20 stations). For sake of clarity stations presenting a neutral impact with values between -3 % and +3 % (60 stations) are not reported. (b), (c), (d) and (e) scatter-plots of R, ubRMSD, absolute bias and RMSD between LDAS\_ERA5 open-loop and the 85 stations from the FLUXNET 2015 (y-axis) and LDAS\_ERA5 analysis and the same pool of stations (x-axis).

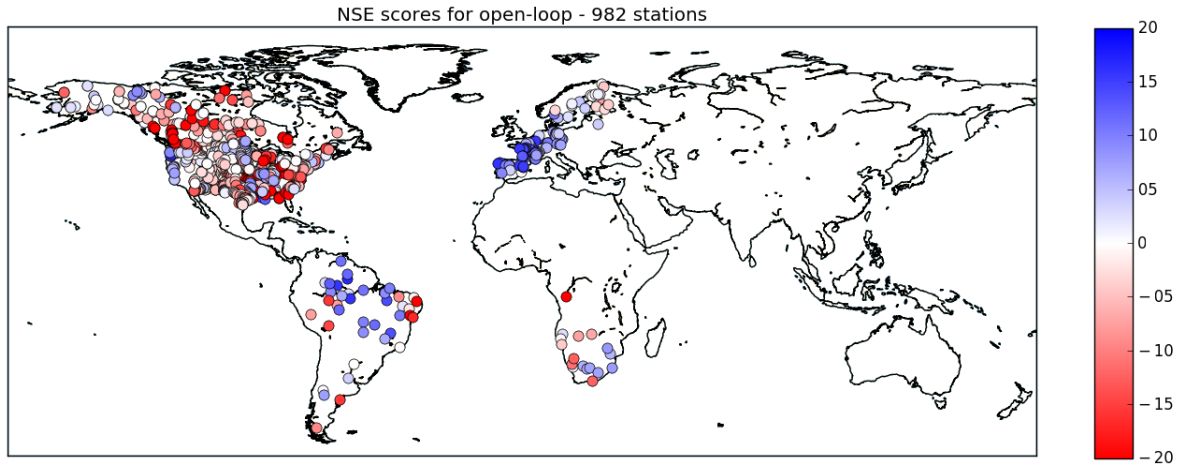

Figure S2: Global map of Nash-Sutcliffe Efficiency score (NSE) between river discharge from LDAS\_ERA5 open-loop and in situ measurements from the networks presented in Table S1 over 2010-2016. Only stations where more than 4-year of data are available, with a drainage area greater than 10000km<sup>2</sup> are considered. Stations with NSE values smaller than -2 are discarded, also, leading to a subset 982 stations available.

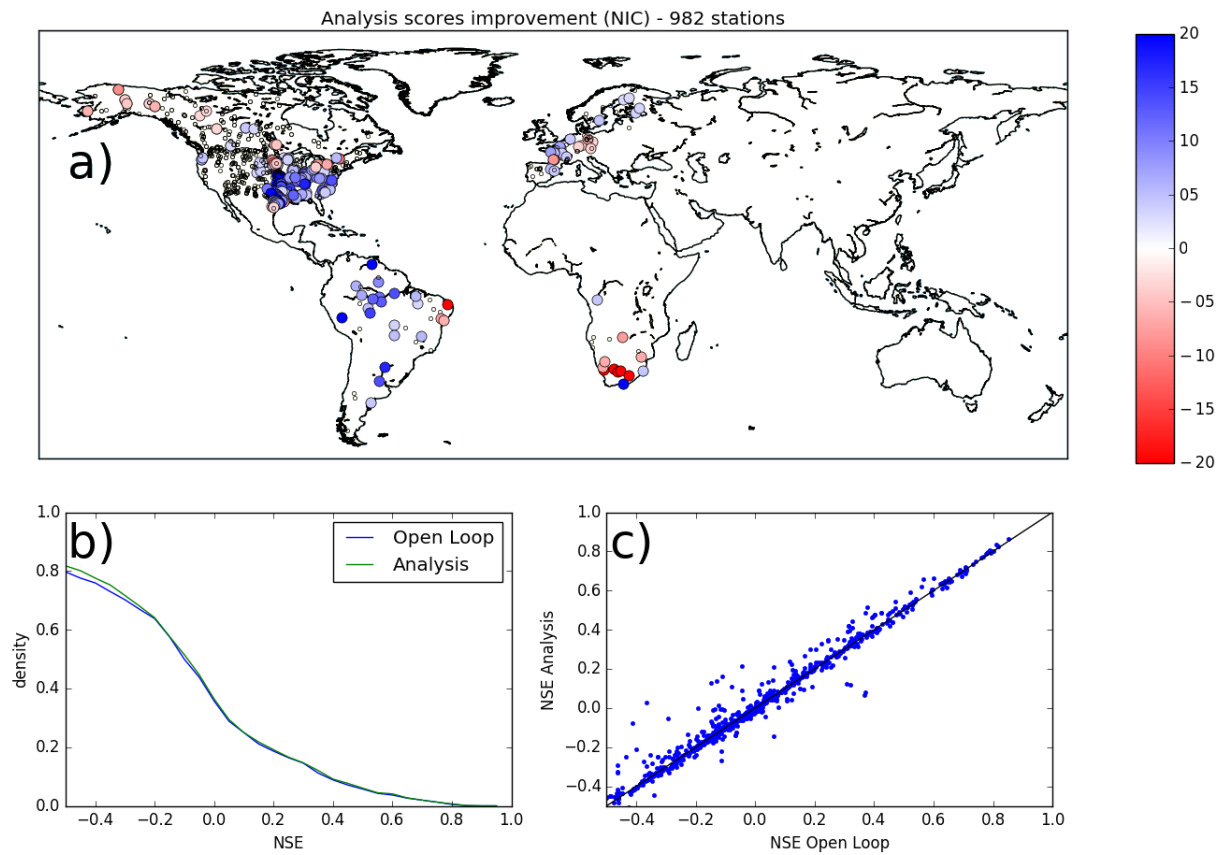

Figure S3: (a) Normalized Information Contribution scores (NIC) based on NSE scores on river discharge. Small dots represent stations for which NIC are between  $[-3\%, +3\%]$  (i.e. neutral impact from LDAS\_ERA5 analysis), NIC values greater than  $+3\%$  (blue large circles) suggest an improvement from LDAS\_ERA5 analysis over LDAS\_ERA5 open-loop while values smaller than  $-3\%$  (large red circles) suggest a degradation. (b) density of NIC values for LDAS\_ERA5 open-loop (in blue) and analysis (in red), (c) scatter-plots of NIC values for LDAS\_ERA5 open-loop (x-axis) and analysis (y-axis).



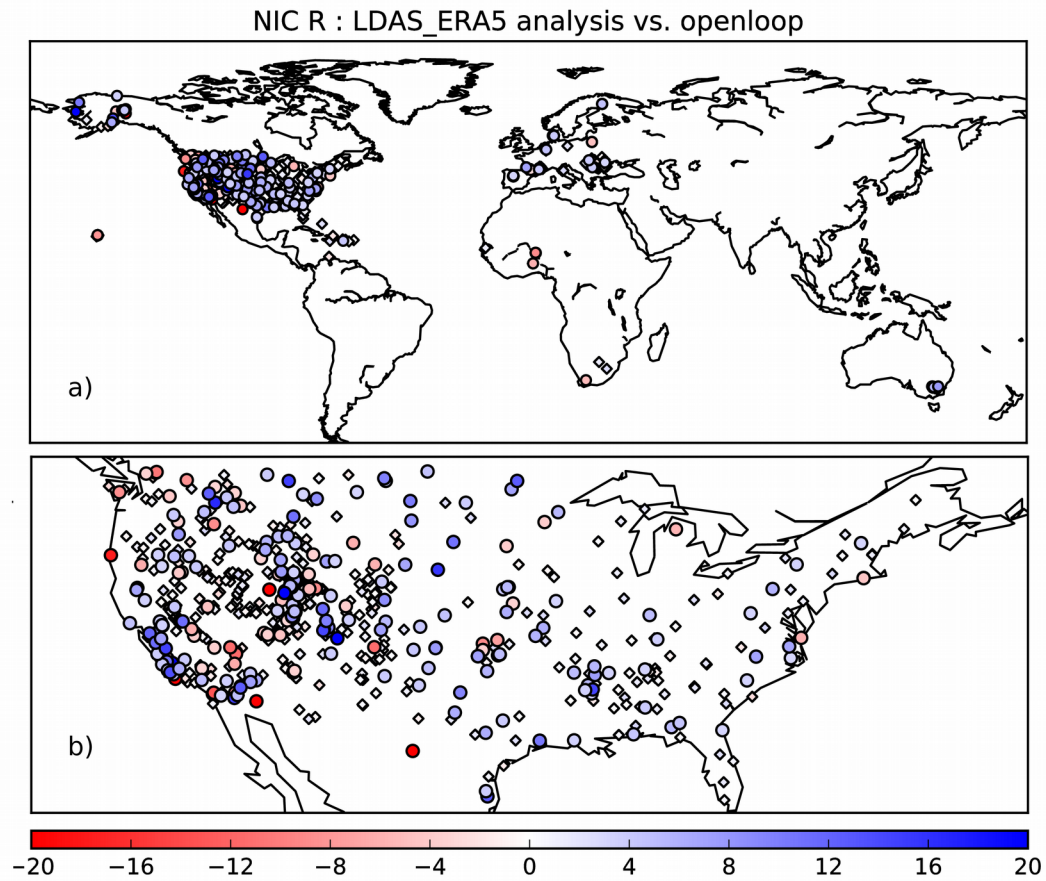

Figure S4: (a) Normalized Information Contribution scores (NIC) based on correlations ( $R$ ) scores between in situ surface soil moisture and surface soil moisture from LDAS\_ERA5 (analysis or open-loop). Small dots represent stations for which NIC are between  $[-3\%, +3\%]$  (i.e. neutral impact from LDAS\_ERA5 analysis), NIC values greater than  $+3\%$  (blue large circles) suggest an improvement from LDAS\_ERA5 analysis over LDAS\_ERA5 open-loop while values smaller than  $-3\%$  (large red circles) suggest a degradation. (b) Same as (a) zooming on the continental USA.

## References

- Albergel, C., Rüdiger, C., Pellarin, T., Calvet, J.-C., Fritz, N., Froissard, F., Suquia, D., Petitpa, A., Piguet, B., and Martin, E.: From near-surface to root-zone soil moisture using an exponential filter: an assessment of the method based on insitu observations and model simulations, *Hydrol. Earth Syst. Sci.*, 12, 1323–1337, 2008.
- Bell, J. E., M. A. Palecki, C. B. Baker, W. G. Collins, J. H. Lawrimore, R. D. Leeper, M. E. Hall, J. Kochendorfer, T. P. Meyers, T. Wilson, and H. J. Diamond. 2013: U.S. Climate Reference Network soil moisture and temperature observations. *J. Hydrometeorol.*, 14, 977-988. doi: 10.1175/JHM-D-12-0146.1
- Brocca, L., Hasenauer, S., Lacava, T., Melone, F., Moramarco, T., Wagner, W., Dorigo, W., Matgen, P., Martínez-Fernández, J., Llorens, P., Latron, J., Martin, C., Bittelli, M. (2011). Soil moisture estimation through ASCAT and AMSR-E sensors: an intercomparison and validation study across Europe. *Remote Sensing of Environment*, 115, 3390-3408, doi:10.1016/j.rse.2011.08.003.
- Beyrich, F. and W.K. Adam, Site and Data Report for the Lindenberg Reference Site in CEOP - Phase 1, *Berichte des Deutschen Wetterdienstes*, 230, Offenbach am Main, 2007
- Bircher, S., Skou, N., Jensen, K.H., Walker, J.P., and Rasmussen, L.: A soil moisture and temperature network for SMOS validation in Western Denmark. *Hydrology and Earth System Sciences Discussions*, 8, 9961-10006, doi:10.5194/hessd-8-9961, 2011
- Larson, M., K., Eric E. Small, Ethan D. Gutmann, Andria L. Bilich, John J. Braun, Valery U. Zavorotny: Use of GPS receivers as a soil moisture network for water cycle studies. *GEOPHYSICAL RESEARCH LETTERS*, VOL. 35, L24405, doi:10.1029/2008GL036013, 2008.
- Lebel, Thierry, Cappelaere, Bernard, Galle, Sylvie, Hanan, Niall, Kergoat, Laurent, Levis, Samuel, Vieux, Baxter, Descroix, Luc, Gosset, Marielle, Mougin, Eric, Peugeot, Christophe and Seguis, Luc: AMMA-CATCH studies in the Sahelian region of West-Africa: An overview. *JOURNAL OF HYDROLOGY*, 375, 3-13, 2009.
- Moghaddam, M., A.R. Silva, D. Clewley, R. Akbar, S.A. Hussaini, J. Whitcomb, R. Devarakonda, R. Shrestha, R.B. Cook, G. Prakash, S.K. Santhana Vannan, and A.G. Boyer. 2016. Soil Moisture Profiles and Temperature Data from SoilSCAPE Sites, USA. ORNL DAAC, Oak Ridge, Tennessee, USA. <http://dx.doi.org/10.3334/ORNLDAAC/1339>
- Morbidelli, R., Saltalippi, C., Flammini, A., Rossi, E. & Corradini, C., Soil water content vertical profiles under natural conditions: Matching of experiments and simulations by a conceptual model. *Hydrological Processes*. 28(17), 4732-4742, doi: 10.1002/hyp.9973, 2014.
- Osenga, E. C., Arnott, J. C., Endsley, K. A., & Katzenberger, J. W.: Bioclimatic and soil moisture monitoring across elevation in a mountain watershed: Opportunities for research and resource management. *Water Resources Research*, 55. <https://doi.org/10.1029/2018WR023653>, 2019.
- Smith, A. B., J. P.Walker, A. W.Western, R. I.Young, K. M.Ellett, R. C.Pipunic, R. B.Grayson, L.Siriwardena, F. H. S.Chiew, and H.Richter, The Murrumbidgee soil moisture monitoring network data set, *Water Resour. Res.*, 48, W07701, doi:10.1029/2012WR011976, 2012.
- Schlenz, F., Dall'Amico, J., Loew, A., Mauser, W. (2012): Uncertainty Assessment of the SMOS Validation in the Upper Danube Catchment. *IEEE Transactions on Geoscience and Remote Sensing*, 50(5), pp.1517–1529. doi: 10.1109/TGRS.2011.2171694.;
- Tagesson T, Fensholt R, Guiro I et al. ,Ecosystem properties of semi-arid savanna grassland in West Africa and its relationship to environmental variability. *Global Change Biology*, 2015 Jan;21(1):250-64. doi: 10.1111/gcb.12734. Epub 2014 Oct 18.

Yang, K., J. Qin, L. Zhao, Y. Y. Chen, W. J. Tang, M. L. Han, Lazhu, Z. Q. Chen, N. Lv, B. H. Ding, H. Wu, C. G. Lin, 2013. A Multi-Scale Soil Moisture and Freeze-Thaw Monitoring Network on the Third Pole, *Bulletin of the American Meteorological Society*, doi: 10.1175/BAMS-D-12-00203.1

Zacharias, S., H.R. Bogen, L. Samaniego, M. Mauder, R. Fuß, T. Pütz, M. Frenzel, M. Schwank, C. Baessler, K. Butterbach-Bahl, O. Bens, E. Borg, A. Brauer, P. Dietrich, I. Hajsek, G. Helle, R. Kiese, H. Kunstmann, S. Klotz, J.C. Munch, H. Papen, E. Priesack, H. P. Schmid, R. Steinbrecher, U. Rosenbaum, G. Teutsch, H. Vereecken. 2011. A Network of Terrestrial Environmental Observatories in Germany. *Vadose Zone J.* 10. 955–973. doi:10.2136/vzj2010.0139
